# Supplementary material
Source: Elsevier journal article supplement (https://www.sciencedirect.com/science/article/pii/S2174204918300084)
Supplement: mmc1 [file S2174204918300084:mmc1.docx]

**HYPERTENSIVE RETINOPATHY IN DIPPER VS. NON-DIPPER PATIENTS**

| Name: |
| --- |
| Hospital number: |
| Date of screening: |

| **Comorbidities** | **Yes** | **No** |
| --- | --- | --- |
|  |  |  |
| Stroke |  |  |
| Coronary artery disease |  |  |
| Peripheral arterial disease |  |  |
|  |  |  |
| **Cardiovascular risk factors** |  |  |
|  |  |  |
| Diabetes |  |  |
| Hypertension |  |  |
| Dyslipidemia |  |  |
| Smoking |  |  |

| **DATE OF HYPERTENSION DIAGNOSIS** |  |  |
| --- | --- | --- |
